# Supplementary material for: The cellular and molecular etiology of the craniofacial defects in the avian ciliopathic mutant talpid2
Source: PubMed Central journal article supplement (PMC4197679; doi:10.1242/dev.105924), 2014-08
Supplement: supp_141.15.3003_DEV105924.pdf [file supp_141.15.3003_DEV105924.pdf]

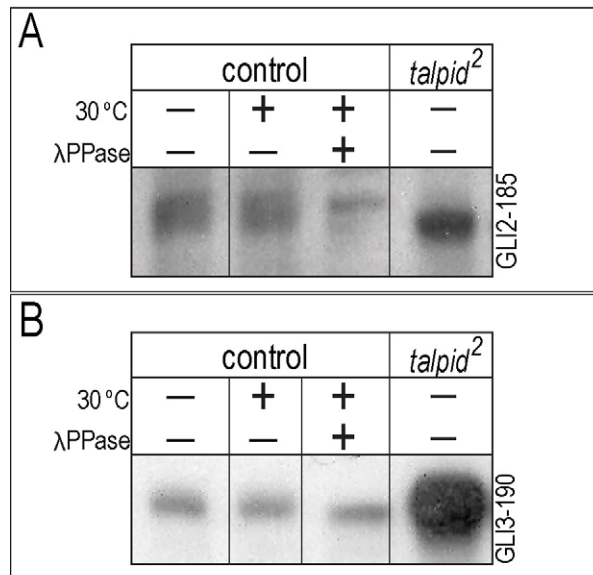

**Figure S1. Phosphatase treatment of GLI2 and GLI3.** (A) Phosphatase treatment of control full-length GLI2-185 did not shift mobility to that of the *talpid*<sup>2</sup> GLI2-185. (B) Phosphatase treatment shifted GLI3-190 in both control and *talpid*<sup>2</sup> embryos.

GTGAAGCGGGAGATGCTCCCGTCGGGGCGGCTGTTGCCGGGCAGCGCGCGCCCTGAGG  
 GAAGCGTTGAGGTGAAGCC  
 1 ATGCACGACAGGAGGCGCGGGCCCTCAGCCCCAGCCCCGGGGGTACCGCGGGCGTCGA 60  
 M Q Q R R P R A S A P A P G V S R R R R 20

Exon2  
 61 GCTCCCGGTGACATCCCGGCTCCACCAGCCTGCCCGCGTGGTGGAGGGCCCTCCGCGC 120  
 A P G D I P A S T S L P P L V E G P P R 40

121 TGCCTCCTCTGCTGCACCGTGGCAGAATCGTGTGGACGGCCGCAAAACCGCCCTCCGCC 180  
 C V L C C T V G R I V W T A A K P P S A 60

181 GCCGTCTCTGCTCCGCTGAGGTGGTGGGGTGGAGCCTCGGACGGTACCGTGTCCACCC 240  
 A V L V R L R W W G E T S D G T V F H P 80

241 TCCTCAAAGCGGGCAGCGCGGGCAGCAGCCGTACACCGTGCGGTGCGGCCCTCCG 300  
 S S K P G Q A A G S S R Y T V R C G P R 100

Exon3  
 301 CAGCTCACGGCTACCTCACAGATATGGGCATGCTTGTCTGGAGTCTGACCAAACCT 360  
 Q L T A Y L T D M G M L V L E V L T K P 120

361 GACCGTCTTCCAGTTGGCAGAGTGCAGATCACCGAATTGTCCCAGCTCTCTCCAGCCAT 420  
 D R L P V G R V Q I T E L S Q L S P S H 140

Exon4  
 421 CCCATCAGTGGTTTTCACCATAGTTTACCACAGCTGATAAATGGGAGAGCTACAG 480  
 P I S G F F T I V S P T A D K L G E L Q 160

481 GTTCACTTGTCTCGAACCTCTATCAGACACATAAAAACAGCAGCTCTGTCCCAACC 540  
 V S L V L E P L S D T Y K T S S S V P T 180

541 ACAGCTACAAGTTCAGATATGACTCCTGCTCCATCGCAGCAAATGCAGACCCTCTCT 600  
 T A T S S D M T P A P S Q Q M Q T T P P 200

Exon5  
 601 GGCCAAGAGCCTGTTAACAAAAGCAGGGTCACGACTCCCACTGGGGAAAGGACCATTCA 660  
 G Q E P V N K S R V T T P S W G K D H S 220

661 TTCTTTCAAGAGACTCTGAAAACATAAAGGATGTTTCTCTGCTTCCCACCACCGCTC 720  
 F F Q E N S E N I K D V S S A S H H R L 240

721 ATTTTACCAGATGAACATTTGAAAGTGAATCCTTTGAGTACAGCAGTCAATATCCCC 780  
 I L P D E H L K V N P L S Q Q S V S F P 260

781 AGCAGCACTGATCCTGAAGCACCCCTCAGTACAAACACACCGTGTCTCTTGCACAAC 840  
 S S T D P E A P L S T N T H V F S L H N 280

Exon6  
 841 CCAACTACAAAAGACCTGCTTTCAGTCTCTTTGGATCAAGGCAATAAATCCGTGATGCC 900  
 P T T K D L L S A L L D Q G N K L R D A 300

901 ATGGTTGCTTCTGCAATGAAGTCCAGCCAGACATGGAGATTGAATTGAATGAAGTGCCT 960  
 M V A S A M K S S P D M E I E L N E V P 320

Exon7  
 961 CCTTTGTAAAGCCAGATGGTTTCAGAGCAGCAGAAAAGAGCCAAAAGGCTTGAACTCA 1020  
 P F V K P D G F R A A A K S P K G L N S 340

1021 ACTTTTATGCCTCCTCCTGAGGATACCCATCTTTCACATCTGAAGTACAGGTCAGCAA 1080  
 T F M P P P E D T H L F T S E V T G Q Q 360

Exon8  
 1081 TTAGACCTCAACTCTGAGGAGAGCAATACAGTTACTGTGGGCAGTCTGATTATCT 1140  
 L D L N S E E R A I Q L L L G S A D L S 380

1141 CCTGTGCATTTCTGGGATCAGCCAGGTTCCCTTCTGGATTCTCTCTGTTGGAAGTGAG 1200  
 P V H F W D Q P G S L L D S L S V G S E 400

1201 GTGTATGACAGTGAATCAATGATCCCCACTATGACCAGAGTCTGCTAGAAAGCTTTTT 1260  
 V Y D S E L N D P H Y D Q S L L E S L F 420

Exon9  
 1261 TACACGACACCTAAATCAGATTCCAGTACAAGTATTCTCCTCAGTATGAAGATGTTAAC 1320  
 Y T T P K S D S S T S D F L S D E D V N 440

1321 CCTCCAAAAAAGTAAAGCAAAACAAAAGTGAAGAAAGCTGATTCTGTGAATGCACAG 1380  
 P S K K V S K T K T V K K A D S V N A Q 460

Exon10  
 1381 AAGGATCCACTGCCTTAGATCAGGATCAGAAGGTGACAGAAATTAACCCAGTGTCTCT 1440

**Figure S2. cDNA and amino acid sequence of chicken C2CD3.**

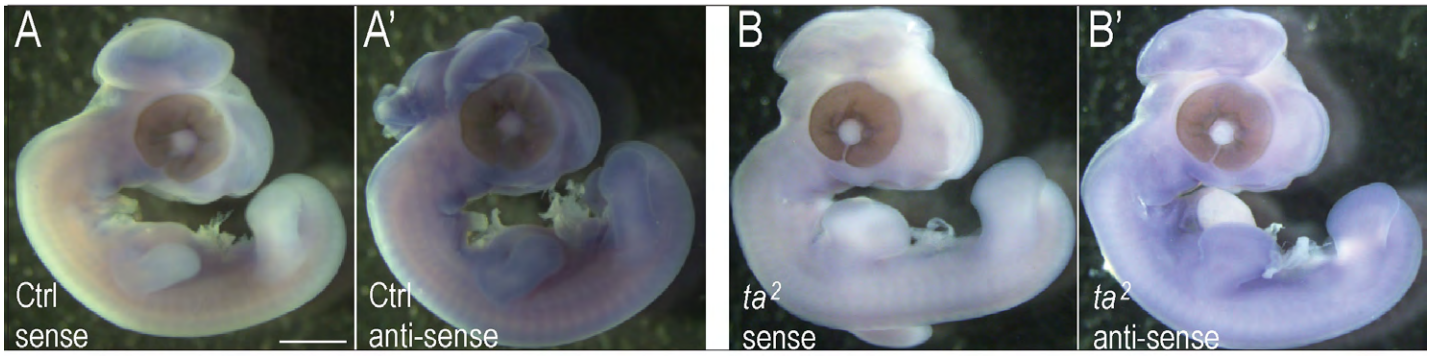

**Figure S3. *C2CD3* is expressed in whole chicken embryos.** (A-B') *In situ* hybridization for *C2CD3* in day 4 whole embryos. Scale bar represents 500  $\mu$ m.

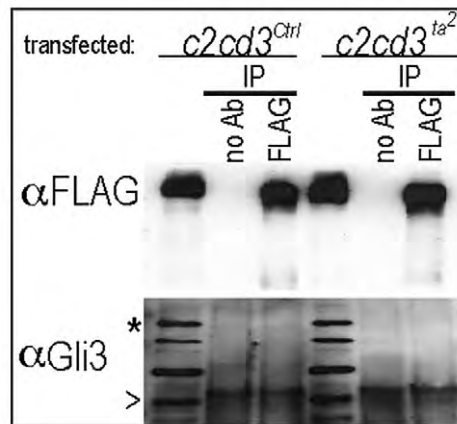

**Figure S4. *C2CD3* does not interact with GLI3.** CEFs were transfected with either p3XFLAG-*c2cd3*<sup>Ctrl</sup> or p3XFLAG-*c2cd3*<sup>ta<sup>2</sup></sup> and immunoprecipitation was performed with anti-GLI3. \* indicates GLI3-190, > indicates cleaved GLI3-83.

Table S1. Densitometry readings of GLI2 and GLI3 nuclear fraction

|     |      | GLI2     |             | GLI3      |             | LAMIN    |             |
|-----|------|----------|-------------|-----------|-------------|----------|-------------|
|     |      | raw #    | normalized  | raw#      | normalized  | raw #    | normalized  |
| FNP | ctrl | 1926.882 | 1           | 3982.368  | 1           | 2948.882 | 1           |
|     | TA2  | 2688.489 | 1.395253575 | 16254.154 | 4.081529884 | 4076.276 | 1.382312348 |
| MXP | ctrl | 4366.518 | 1           | 6927.711  | 1           | 3294.225 | 1           |
|     | TA2  | 4703.43  | 1.077158047 | 19972.267 | 2.882953258 | 3812.296 | 1.157266428 |
| MNP | ctrl | 2385.305 | 1           | 3486.794  | 1           | 4547.205 | 1           |
|     | TA2  | 4756.903 | 1.994253565 | 12053.296 | 3.456842016 | 9019.539 | 1.983534721 |

Table S2.

[Download Table S2](#)

Table S3.

[Download Table S3](#)

**Table S4. Variant frequency in ta2.003 candidate intervals**

| candidate ta-2 region<br>Galgal4 coordinates | size<br>Mb | UCD003<br>SNP | UCD003<br>DIP | tal2-specific<br>SNP | tal2-<br>specific<br>DIP | UCD003<br>SNP/Mb | tal2-<br>specific<br>SNP/Mb | fixed tal2-<br>specific<br>SNP | fixed tal2-specific<br>SNP/Mb | fixed ta-<br>2/UCD003<br>SNP ratio | tal2/UCD003<br>DIP ratio |
|----------------------------------------------|------------|---------------|---------------|----------------------|--------------------------|------------------|-----------------------------|--------------------------------|-------------------------------|------------------------------------|--------------------------|
| chr1:115764249-118327843                     | 2.56       | 25484         | 1407          | 2575                 | 335                      | 9955             | 1006                        | 752                            | 294                           | 0.030                              | 0.24                     |
| chr1:193748573-195187547                     | 1.44       | 15300         | 658           | 2819                 | 238                      | 10625            | 1958                        | 1550                           | 1076                          | 0.101                              | 0.36                     |
| chr10:8513002-10170824                       | 1.66       | 14620         | 815           | 1134                 | 151                      | 8807             | 683                         | 314                            | 189                           | 0.021                              | 0.19                     |
| chr10:11552743-12453463                      | 0.90       | 11022         | 627           | 730                  | 95                       | 12247            | 811                         | 89                             | 99                            | 0.008                              | 0.15                     |
| chr15:10301074-11866661                      | 1.57       | 17508         | 857           | 125                  | 40                       | 11152            | 80                          | 59                             | 38                            | 0.003                              | 0.05                     |

Variant frequencies are shown (total and per Mb) for UCD003 and ta2.003-specific. Fixed refers to those variants found in all ta2.003 reads that likely include fewer false positives. DIP, deletion/insertion polymorphism.

Table S5. Coding variants in C2CD3

| mRNA coord<br>rel to ATG 89 | Coordinate (Galgal4) 194883819 | Reference C | GGA1 Reference |                                     | variant in ta2.003 |
|-----------------------------|--------------------------------|-------------|----------------|-------------------------------------|--------------------|
|                             |                                |             | ta2.003 G      | Amino Acid Change Ser30Thr          |                    |
| 167                         | 194883741                      | T           | C              | Lys56Arg                            | ta2.003            |
| 957                         | 194879146                      | C           | T              | synonymous                          | ta2.003            |
| 2178                        | 194867809                      | G           | A              | synonymous                          | ta2.003            |
| 2325                        | 194867662                      | G           | A              | synonymous                          | ta2.003            |
| 2344                        | 194867643                      | C           | G              | Ala782Pro                           | ta2.003            |
| 2346                        | 194867641                      | A           | G              | synonymous                          | ta2.003            |
| 4049                        | 194858002                      | C           | T              | Gly1350Asp                          | ta2.003            |
| 4595                        | 194856869                      | G           | A              | Pro1532Leu                          | ta2.003            |
| 4598                        | 194856866                      | G           | A              | Thr1533Ile                          | ta2.003            |
| 4674                        | 194856790                      | C           | A              | Gln1558His                          | ta2.003            |
| 5870                        | 194844961                      | C           | T              | Gly1957Asp                          | ta2.003            |
| 6570                        | 194844261                      | T           | C              | synonymous                          | ta2.003            |
| 6626-6644                   | 194844184-194844202            |             | 19 bp deletion | deletes a.a. from 2210-2330         | ta2.003            |
| 6648                        | 194844180                      | A           | G              | synonymous after<br>frameshift/stop | ta2.003            |
| 6767                        | 194842820                      | A           | G              | Val2256Ala after frameshift/stop    | ta2.003            |
| 1022                        | 194877027                      | G           | T              | Thr341Asn                           | ta2.003 and UCD003 |
| 1194                        | 194875767                      | T           | C              | synonymous                          | ta2.003 and UCD003 |

Exonic variants confirmed by whole genome sequencing and resequencing in C2CD3.
